# Supplementary material for: Discovery and clinical introduction of first-in-class imipridone ONC201
Source: PubMed Central journal article supplement (PMC5342060; doi:10.18632/oncotarget.11814), 2016-09-01

# **Discovery and clinical introduction of first-in-class imipridone ONC201**

## **Supplementary Material**

### **Supplementary Table 1. Summary of ONC201 *in vivo* anti-cancer efficacy studies.**

Note: s.c.: subcutaneous, IP: intraperitoneal, PO: oral, IV: intravenous, NA: not applicable, CSC: cancer stem cell

| Tumor type             | Mouse model                                                | Dose, Route                | Frequency                   | ONC201 | Efficacy                                                                            | Comparison                                        | Combination                                                                       | CSC-efficacy | Reference |
|------------------------|------------------------------------------------------------|----------------------------|-----------------------------|--------|-------------------------------------------------------------------------------------|---------------------------------------------------|-----------------------------------------------------------------------------------|--------------|-----------|
| Lymphoma               | Eμ-myc transgenic                                          | 25 mg/kg, PO               | 1x/week                     |        | Prolonged survival                                                                  | NA                                                | NA                                                                                | NA           | 1         |
| Acute Myeloid Leukemia | Patient-derived cells serially passaged in NSG mice (i.v.) | 5 μM, <i>in vitro</i>      | 48hrs in vitro              |        | Prolonged survival                                                                  | NA                                                | NA                                                                                | Yes          | 7         |
| Glioblastoma           | T98G s.c.                                                  | 30 mg/kg, PO               | single dose                 |        | Partial regression                                                                  | slightly better than bevacizumab                  | NA                                                                                | NA           | 1         |
|                        | SF767 intracranial                                         | 25 mg/kg, PO               | single dose                 |        | Prolonged survival                                                                  | survival better than bevacizumab                  | bevacizumab+ONC201 further improved survival                                      | NA           | 1         |
|                        | MGPP-3 s.c.                                                | 25 mg/kg, IP               | 3x/week                     |        | Partial regression followed by progression                                          | ABT263 response similar to ONC201                 | ABT263+ONC201 tumor regression better than single agent                           | Yes          | 30        |
| Colorectal             | SW480/RKO/HCT116 p53 null s.c.                             | 30/50/100 mg/kg, IP and PO | single dose                 |        | Stasis                                                                              | NA                                                | NA                                                                                | NA           | 1         |
|                        | HCT116 wt/p53 null and DL-D-1 s.c.                         | 12.5/25/50/80/100 mg/kg    | single dose, 1-2 doses/week |        | Partial regression                                                                  | similar or slightly better than rTRAIL            | NA                                                                                | NA           | 1, 2      |
|                        | HCT116 p53 null, intracanal                                | IP/IVPO                    | 1x/2-3weeks                 |        |                                                                                     |                                                   |                                                                                   | NA           | 1         |
|                        | HCT116 p53 null, intracanal                                | 25 mg/kg, PO               | 1x/week                     |        | slightly reduced primary tumor and decreased metastasis                             | better than bevacizumab                           | bevacizumab+ONC201 improved primary tumor reduction and decreased lung metastasis | NA           | 1         |
|                        | DL1, Ad5fluor+ CSCs s.c., passage, limiting dilution       | 50 mg/kg IP                | 1x/week                     |        | Partial regression, reduction of passage decreased tumor initiation and CSC markers | superior to 5-Fluorouracil                        | NA                                                                                | Yes          | 26        |
| Head and Neck          | Fadu squamous cell, s.c.                                   | 50 mg/kg, PO               | 2x/week                     |        | Partial regression followed by progression                                          | radiation resistant                               | ONC201+radiation slightly better than single agent                                | NA           |           |
| Breast                 | MDA-MB-231 (triple-negative)                               | 50/100 mg/kg IP            | single dose                 |        | Partial regression                                                                  | superior to rTRAIL                                | NA                                                                                | NA           | 1         |
| Lung                   | H460 (non-small cell)                                      | 30 mg/kg, IP               | single dose                 |        | Partial regression                                                                  | superior to docetaxel                             | complete regressions in combination with paclitaxel/docetaxel                     | NA           | 1         |
| Hepatocellular         | HepG2                                                      | 25 mg/kg, PO               | 1x/week                     |        | Partial regression                                                                  | superior to Sorafenib                             | complete regressions with ONC201+sorafenib                                        | NA           | 35        |
| Pancreatic             | Panc-1 s.c.                                                | 30 mg/kg, PO               | daily                       |        | Partial regression and prolonged survival                                           | superior tumor regression compared to gemcitabine | ONC201+gemcitabine improved tumor regression and survival                         | NA           | 41        |

Supplemental Figure 1. Pharmacokinetics of single dose ONC201 in (A) Sprague Dawley rats and (B) beagle dogs.

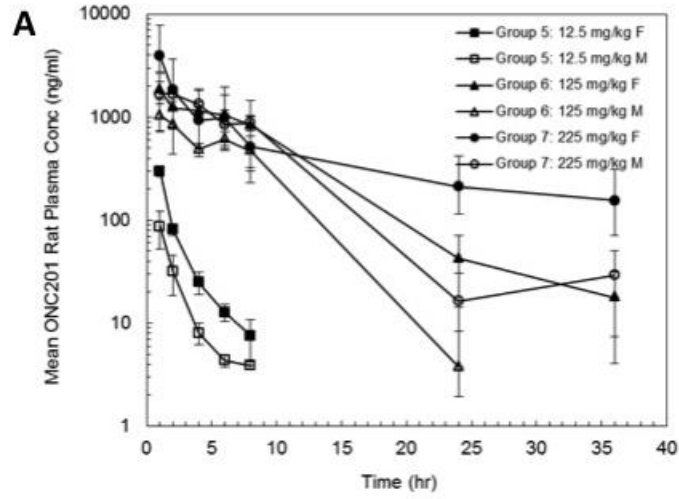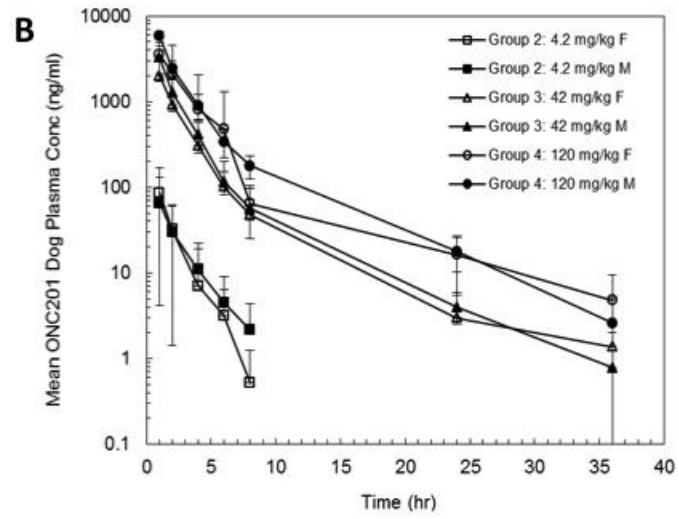

Supplement: oncotarget-07-74380-s001.pdf [file oncotarget-07-74380-s001.pdf]
